# Supplementary material for: Extracts from the Mediterranean Food Plants Carthamus lanatus, Cichorium intybus, and Cichorium spinosum Enhanced GSH Levels and Increased Nrf2 Expression in Human Endothelial Cells
Source: PubMed Central journal article supplement (PMC6276477; doi:10.1155/2018/6594101), 2018-11-15
Supplement: 6594101.f1.pdf [file 6594101.f1.pdf]

## **SUPPLEMENTARY INFORMATION**

Relative quantification of main secondary metabolites detected in the chórta decoctions. Detection at 280 nm.

*Table 1 Relative quantification of main secondary metabolites in the Cichorium spinosum decoction.*

| <b>Retention Time (min)</b> | <b>Compound</b>                                                         | <b>Area % at 280nm</b> |
|-----------------------------|-------------------------------------------------------------------------|------------------------|
| 17.0                        | caftaric acid                                                           | 7.7                    |
| 21.0                        | caffeoylquinic acid isomer                                              | 4.5                    |
| 26.5                        | cichoric acid                                                           | 38.8                   |
| 29.0-32.0                   | luteolin diglycoside,<br>quercetin glucuronide,<br>luteolin glucuronide | ~9.5                   |

*Table 2 Relative quantification of main secondary metabolites in the Cichorium intybus decoction.*

| <b>Retention Time (min)</b> | <b>Compound</b>            | <b>Area % at 280nm</b> |
|-----------------------------|----------------------------|------------------------|
| 17.0                        | caftaric acid              | 1.9                    |
| 21.5                        | caffeoylquinic acid isomer | 6.3                    |
| 27.0                        | cichoric acid              | 50.5                   |
| 32.0                        | luteolin glucuronide       | 14.1                   |
| 33.8                        | dicafeoylquinic acid       | 2.5                    |

*Table 3 Relative quantification of main secondary metabolites in the Crepis sancta decoction.*

| <b>Retention Time (min)</b> | <b>Compound</b>            | <b>Area % at 280nm</b> |
|-----------------------------|----------------------------|------------------------|
| 17.0                        | caftaric acid              | 1.8                    |
| 21.2                        | caffeoylquinic acid isomer | 9.9                    |
| 27.0                        | cichoric acid              | 53.7                   |
| 32.0                        | luteolin glucuronide       | 9.7                    |
| 33.9                        | dicafeoylquinic acid       | 2.3                    |

*Table 4 Relative quantification of main secondary metabolites in the Sonchus asper decoction.*

| <b>Retention Time (min)</b> | <b>Compound</b>            | <b>Area % at 280nm</b> |
|-----------------------------|----------------------------|------------------------|
| 17.2                        | caftaric acid              | 9.3                    |
| 21.7                        | caffeoylquinic acid isomer | 2.2                    |
| 27.3                        | cichoric acid              | 28.4                   |
| 32.0                        | luteolin glucuronide       | 16.2                   |
| 35.0                        | apigenin glucuronide       | 8.7                    |

Table 5 Relative quantification of main secondary metabolites in the *Carthamus lanatus* decoction.

| <b>Retention Time (min)</b> | <b>Compound</b>            | <b>Area % at 280nm</b> |
|-----------------------------|----------------------------|------------------------|
| 20.7                        | caffeoylquinic acid isomer | 7.6                    |
| 29.8                        | quercetin glucoside        | 30.8                   |
| 31.0                        | luteolin glucoside         | 27.9                   |
| 33.5                        | quercetin acetyl glucoside | 15.2                   |
| 34.9                        | luteolin acetyl glucoside  | 7.5                    |

Table 6 Relative quantification of main secondary metabolites in the *Amaranthus blitum* decoction.

| <b>Retention Time (min)</b> | <b>Compound</b>      | <b>Area % at 280nm</b> |
|-----------------------------|----------------------|------------------------|
| 13.0-21.0                   | hydroxycinnamates    | ~ 28.0                 |
| 25.8                        | rutin                | 23.0                   |
| 29.3                        | luteolin diglycoside | 6.2                    |
| 47.5, 52.0                  | triterpene saponins  | ~ 22.0                 |
